# Supplementary material for: Prediagnostic Serum Organochlorine Concentrations and Metastatic Prostate Cancer: A Nested Case–Control Study in the Norwegian Janus Serum Bank Cohort
Source: PubMed Central journal article supplement (PMC4559951; doi:10.1289/ehp.1408245), 2015-03-03
Supplement: ehp.1408245.s001.acco.pdf [file ehp.1408245.s001.acco.pdf]

**Note to Readers:** *EHP* strives to ensure that all journal content is accessible to all readers. However, some figures and Supplemental Material published in *EHP* articles may not conform to 508 standards due to the complexity of the information being presented. If you need assistance accessing journal content, please contact [ehp508@niehs.nih.gov](mailto:ehp508@niehs.nih.gov). Our staff will work with you to assess and meet your accessibility needs within 3 working days.

## **Supplemental Material**

### **Prediagnostic Serum Organochlorine Concentrations and Metastatic Prostate Cancer: A Nested Case–Control Study in the Norwegian Janus Serum Bank Cohort**

Stella Koutros, Hilde Langseth, Tom K. Grimsrud, Dana Boyd Barr, Roel Vermeulen, Lützen Portengen, Sholom Wacholder, Laura E. Beane Freeman, Aaron Blair, Richard B. Hayes, Nathaniel Rothman, and Lawrence S. Engel

#### **Table of Contents**

**Table S1.** Median concentration of pesticides and PCB congeners in the Janus prostate study.

**Table S2.** Spearman Correlation Matrix for Pesticides Measured in the Janus prostate study.

**Table S3.** Association between PCB congeners not shown in Table 3 and risk of prostate cancer in the JANUS prostate study.

**Table S1.** Median concentration of pesticides and PCB congeners in the Janus prostate study.

| <b>Analyte (ng/g lipid)</b> | <b>Cases<br/>n=150<br/>Median (Range)</b> | <b>Controls<br/>n=314<br/>Median (Range)</b> | <b>Intrabatch<br/>CV<br/>Median</b> | <b>Interbatch<br/>CV<br/>Median</b> | <b>% below<br/>Limit of<br/>detection</b> |
|-----------------------------|-------------------------------------------|----------------------------------------------|-------------------------------------|-------------------------------------|-------------------------------------------|
| Chlordane                   | 60.6 (12.5-605.4)                         | 57.2 (5.1-2207.7)                            |                                     |                                     |                                           |
| Oxychlordane                | 19.0 (0.9-190.8)                          | 17.5 (0.57-87.7)                             | 8                                   | 30                                  | 15                                        |
| trans-Nonachlor             | 26.9 (8.2-284.3)                          | 26.1 (4.0-161.7)                             | 7                                   | 28                                  | 0                                         |
| Heptachlor Epoxide          | 13.4 (0.1-130.3)                          | 12.8 (0.3-2158.4)                            | 7                                   | 112                                 | 9                                         |
| DDT                         | 2552.1 (20.9-29110.4)                     | 2432.4 (7.3-44158.6)                         |                                     |                                     |                                           |
| p,p'-DDT                    | 288.2 (13.8-2120.3)                       | 282.1 (0.9-2943.2)                           | 4                                   | 21                                  | 0                                         |
| p,p'-DDE                    | 2232.1 (6.3-27170.1)                      | 2071.8 (5.8-43636.7)                         | 5                                   | 58                                  | 0                                         |
| o,p'-DDT                    | 21.9 (0.7-225.8)                          | 22.1 (0.6-381.5)                             | 7                                   | 165                                 | 1                                         |
| Hexachlorobenzene           | 514.6 (51.0-3508.4)                       | 559.8 (58.9-3185.9)                          | 16                                  | 58                                  | 0                                         |
| γ-Hexachlorocyclohexane     | 8.0 (0.5-4621.4)                          | 7.8 (0.5-124.0)                              | 8                                   | 56                                  | 24                                        |
| β-Hexachlorocyclohexane     | 166.2 (15.0-2990.0)                       | 158.7 (41.5-1249.1)                          | 5                                   | 22                                  | 0                                         |
| Dieldrin                    | 63.2 (1.4-556.6)                          | 58.3 (1.0-1820.4)                            | 6                                   | 144                                 | 11                                        |
| Mirex                       | 1.8 (0.1-37.1)                            | 1.7 (0.1-18.3)                               | 11                                  | 33                                  | 12                                        |
| <u>PCB Congener</u>         |                                           |                                              |                                     |                                     |                                           |
| 18                          | 42.2 (9.0-448.1)                          | 44.8 (5.0-832.9)                             | 6                                   | 42                                  | 0                                         |
| 28                          | 82.5 (11.2-1015.1)                        | 80.5 (13.2-1553.2)                           | 4                                   | 38                                  | 0                                         |
| 44                          | 10.9 (0.8-118.1)                          | 12.2 (0.5-211.7)                             | 6                                   | 37                                  | 5                                         |
| 49                          | 6.6 (0.1-83.7)                            | 7.4 (0.4-179.8)                              | 6                                   | 40                                  | 2                                         |
| 52                          | 19.8 (4.4-154.3)                          | 21.5 (2.8-319.3)                             | 5                                   | 34                                  | 0                                         |
| 66                          | 18.5 (2.5-218.2)                          | 18.9 (1.5-92.2)                              | 6                                   | 29                                  | 0                                         |
| 74                          | 50.6 (11.4-398.0)                         | 50.7 (1.0-238.8)                             | 7                                   | 24                                  | 0                                         |
| 99                          | 70.1 (3.3-407.1)                          | 70.0 (1.0-417.9)                             | 7                                   | 28                                  | 0                                         |
| 101                         | 14.6 (1.4-123.0)                          | 14.7 (1.5-115.7)                             | 7                                   | 34                                  | 4                                         |
| 118                         | 108.0 (8.2-754.5)                         | 106.4 (7.2-502.9)                            | 3                                   | 24                                  | 0                                         |
| 128                         | 3.6 (0.03-40.1)                           | 3.3 (0.005-27.3)                             | 8                                   | 45                                  | 40                                        |
| 138                         | 187.1 (14.1-716.3)                        | 189.1 (56.0-834.3)                           | 5                                   | 21                                  | 0                                         |
| 146                         | 49.3 (8.5-175.3)                          | 49.7 (7.1-173.9)                             | 5                                   | 62                                  | 0                                         |
| 153                         | 405.5 (40.6-1421.9)                       | 404.5 (1.6-1425.3)                           | 4                                   | 20                                  | 0                                         |
| 156                         | 32.0 (2.2-111.1)                          | 33.0 (2.0-190.5)                             | 4                                   | 20                                  | 0                                         |

| Analyte (ng/g lipid) | Cases<br>n=150<br>Median (Range) | Controls<br>n=314<br>Median (Range) | Intrabatch<br>CV<br>Median | Interbatch<br>CV<br>Median | % below<br>Limit of<br>detection |
|----------------------|----------------------------------|-------------------------------------|----------------------------|----------------------------|----------------------------------|
| 157                  | 5.7 (0.04-109.7)                 | 5.3 (0.1-119.9)                     | 6                          | 90                         | 14                               |
| 167                  | 9.5 (0.7-47.7)                   | 9.6 (0.8-35.3)                      | 8                          | 30                         | 13                               |
| 170                  | 91.7 (9.0-260.7)                 | 94.9 (29.1-275.3)                   | 4                          | 19                         | 0                                |
| 172                  | 12.8 (0.6-48.3)                  | 12.1 (0.5-42.5)                     | 8                          | 129                        | 10                               |
| 177                  | 17.7 (1.9-48.3)                  | 18.0 (1.7-72.0)                     | 6                          | 21                         | 0                                |
| 178                  | 12.6 (0.9-37.5)                  | 12.7 (0.4-44.7)                     | 3                          | 47                         | 13                               |
| 180                  | 209.5 (4.1-605.0)                | 211.8 (25.6-605.4)                  | 5                          | 20                         | 0                                |
| 183                  | 28.4 (2.6-100.1)                 | 28.5 (3.2-85.2)                     | 5                          | 21                         | 0                                |
| 187                  | 69.8 (9.1-227.9)                 | 70.7 (6.6-217.8)                    | 6                          | 18                         | 0                                |
| 189                  | 2.1 (0.003-8.7)                  | 2.8 (0.003-11.8)                    | 13                         | 52                         | 32                               |
| 194                  | 26.6 (3.7-70.9)                  | 27.2 (3.4-107.2)                    | 6                          | 17                         | 0                                |
| 195                  | 7.1 (0.9-19.1)                   | 7.2 (0.8-20.8)                      | 10                         | 31                         | 4                                |
| 196                  | 13.9 (2.8-41.6)                  | 14.1 (2.1-66.5)                     | 7                          | 24                         | 0                                |
| 201                  | 22.6 (3.2-73.3)                  | 23.0 (2.8-94.1)                     | 7                          | 18                         | 0                                |
| 206                  | 9.8 (1.5-34.4)                   | 9.7 (1.4-34.5)                      | 5                          | 17                         | 0                                |
| 209                  | 8.1 (1.1-27.7)                   | 7.6 (0.1-108.3)                     | 4                          | 18                         | 0                                |
| Total PCBs           | 1710.4 (330.1-6069.8)            | 1763.2 (318.6-4836.8)               |                            |                            |                                  |
| Low Chlorinated      | 227.3 (63.7-1388.3)              | 246.4 (74.3-3363.7)                 |                            |                            |                                  |
| Medium Chlorinated   | 1355.2 (151.5-4976.5)            | 1343.0 (257.8-4468.3)               |                            |                            |                                  |
| High Chlorinated     | 89.8 (20.4-240.0)                | 87.8 (10.9-366.6)                   |                            |                            |                                  |
| Wolff 1              | 171.6 (32.1-544.3)               | 177.8 (44.7-839.4)                  |                            |                            |                                  |
| Wolff 1a             | 37.9 (8.4-356.1)                 | 40.3 (4.9-710.8)                    |                            |                            |                                  |
| Wolff 1b             | 127.1 (17.3-361.1)               | 129.2 (27.6-426.9)                  |                            |                            |                                  |
| Wolff 2              | 515.3 (57.9-2433.4)              | 513.2 (109.2-1594.8)                |                            |                            |                                  |
| Wolff 2a             | 220.0 (34.8-1431.2)              | 225.0 (13.4-813.3)                  |                            |                            |                                  |
| Wolff 2b             | 280.3 (23.1-1002.2)              | 283.1 (95.7-1126.5)                 |                            |                            |                                  |
| Wolff 3              | 732.8 (88.6-2518.3)              | 736.0 (111.9-2452.9)                |                            |                            |                                  |
| Total PCBs           | 1710.4 (330.1-6069.8)            | 1763.2 (318.6-4836.8)               |                            |                            |                                  |

**Table S2.** Spearman Correlation Matrix for Pesticides Measured in the Janus prostate study.

| Analyte                         | Chlordane | OXY  | TNA  | HPE   | DDT  | PDT    | PDE  | ODT   | HCB  | BHC   | GHC  | Dieldrin | Mirex  |
|---------------------------------|-----------|------|------|-------|------|--------|------|-------|------|-------|------|----------|--------|
| Chlordane                       | 1         | 0.93 | 0.80 | 0.76  | 0.41 | 0.41   | 0.42 | 0.29  | 0.43 | 0.35  | 0.22 | 0.46     | 0.47   |
| Oxychlordane                    | 0.93      | 1    | 0.74 | 0.55  | 0.32 | 0.32   | 0.38 | 0.20  | 0.43 | 0.27  | 0.17 | 0.33     | 0.49   |
| trans-Nonachlor                 | 0.80      | 0.74 | 1    | 0.57  | 0.47 | 0.43   | 0.45 | 0.39  | 0.40 | 0.34  | 0.17 | 0.40     | 0.53   |
| Heptachlor Epoxide              | 0.75      | 0.55 | 0.57 | 1     | 0.48 | 0.50   | 0.44 | 0.39  | 0.38 | 0.49  | 0.30 | 0.59     | 0.19   |
| DDT                             | 0.41      | 0.32 | 0.47 | 0.48  | 1    | 0.92   | 0.86 | 0.91  | 0.24 | 0.52  | 0.22 | 0.53     | 0.03   |
| p,p'-DDT                        | 0.41      | 0.32 | 0.43 | 0.50  | 0.92 | 1      | 0.72 | 0.80  | 0.23 | 0.53  | 0.26 | 0.56     | -0.001 |
| p,p'-DDE                        | 0.42      | 0.38 | 0.45 | 0.44  | 0.86 | 0.73   | 1    | 0.65  | 0.30 | 0.47  | 0.15 | 0.36     | 0.11   |
| o,p'-DDT                        | 0.29      | 0.20 | 0.38 | 0.39  | 0.91 | 0.80   | 0.65 | 1     | 0.13 | 0.45  | 0.19 | 0.52     | -0.03  |
| Hexachlorobenzene               | 0.43      | 0.43 | 0.40 | 0.38  | 0.24 | 0.23   | 0.30 | 0.13  | 1    | 0.25  | 0.18 | 0.18     | 0.24   |
| $\beta$ -Hexachlorocyclohexane  | 0.35      | 0.27 | 0.34 | 0.49  | 0.52 | 0.53   | 0.47 | 0.44  | 0.25 | 1     | 0.23 | 0.51     | -0.07  |
| $\gamma$ -Hexachlorocyclohexane | 0.22      | 0.17 | 0.17 | 0.30  | 0.21 | 0.26   | 0.15 | 0.19  | 0.18 | 0.23  | 1    | 0.28     | 0.01   |
| Dieldrin                        | 0.47      | 0.33 | 0.40 | 0.59  | 0.53 | 0.56   | 0.36 | 0.52  | 0.18 | 0.51  | 0.28 | 1        | 0.04   |
| Mirex                           | 0.47      | 0.49 | 0.53 | 0.190 | 0.02 | -0.001 | 0.11 | -0.03 | 0.23 | -0.07 | 0.01 | 0.04     | 1      |

Abbreviations: OXY: Oxychlordane; TNA: trans-Nonachlor; HPE: Heptachlor Epoxide; PDT: p,p'-DDT; PDE: p,p'-DDE; ODT: o,p'-DDT; HCB:

Hexachlorobenzene; BHC:  $\beta$ -Hexachlorocyclohexane; GHC: $\gamma$ -Hexachlorocyclohexane.

**Table S3.** Association between PCB congeners not shown in Table 3 and risk of prostate cancer in the JANUS prostate study.

| PCB congener | Continuous OR <sup>a,b</sup> (95% CI) | Q2 vs. Q1 OR <sup>b</sup> (95% CI) | Q3 vs. Q1 OR <sup>b</sup> (95% CI) | Q4 vs. Q1 OR <sup>b</sup> (95% CI) |
|--------------|---------------------------------------|------------------------------------|------------------------------------|------------------------------------|
| PCB 18       | 0.93 (0.65, 1.34)                     | 2.22 (1.16, 4.24)                  | 1.92 (0.92, 3.99)                  | 1.02 (0.44, 2.38)                  |
| PCB 28       | 0.75 (0.49, 1.16)                     | 0.81 (0.41, 1.61)                  | 0.91 (0.43, 1.94)                  | 0.81 (0.33, 2.00)                  |
| PCB 49       | 0.90 (0.70, 1.15)                     | 0.99 (0.55, 1.78)                  | 0.77 (0.39, 1.53)                  | 0.49 (0.21, 1.14)                  |
| PCB 52       | 0.70 (0.48, 1.03)                     | 0.77 (0.43, 1.37)                  | 0.61 (0.32, 1.17)                  | 0.55 (0.26, 1.16)                  |
| PCB 66       | 0.82 (0.55, 1.22)                     | 0.38 (0.19, 0.73)                  | 0.61 (0.33, 1.13)                  | 0.64 (0.30, 1.34)                  |
| PCB 74       | 0.88 (0.57, 1.37)                     | 0.71 (0.39, 1.30)                  | 1.06 (0.58, 1.94)                  | 0.69 (0.35, 1.34)                  |
| PCB 99       | 0.90 (0.61, 1.34)                     | 1.22 (0.69, 2.16)                  | 1.39 (0.77, 2.50)                  | 0.91 (0.48, 1.75)                  |
| PCB 118      | 0.98 (0.61, 1.58)                     | 1.00 (0.56, 1.80)                  | 1.08 (0.60, 1.95)                  | 1.07 (0.56, 2.02)                  |
| PCB 128      | 1.00 (0.87, 1.15)                     | 0.71 (0.29, 1.76)                  | 1.04 (0.55, 1.98)                  | 0.99 (0.52, 1.89)                  |
| PCB 138      | 0.80 (0.46, 1.38)                     | 1.38 (0.76, 2.52)                  | 1.26 (0.69, 2.31)                  | 1.12 (0.60, 2.10)                  |
| PCB 146      | 1.01 (0.65, 1.55)                     | 1.20 (0.68, 2.12)                  | 1.17 (0.64, 2.13)                  | 1.08 (0.58, 2.01)                  |
| PCB 156      | 0.95 (0.61, 1.48)                     | 1.14 (0.64, 2.03)                  | 1.38 (0.77, 2.47)                  | 0.80 (0.42, 1.52)                  |
| PCB 157      | 0.99 (0.80, 1.24)                     | 0.82 (0.41, 1.66)                  | 1.27 (0.69, 2.33)                  | 0.86 (0.43, 1.71)                  |
| PCB 167      | 1.08 (0.83, 1.40)                     | 0.89 (0.46, 1.72)                  | 0.77 (0.41, 1.47)                  | 1.23 (0.67, 2.29)                  |
| PCB 170      | 0.72 (0.41, 1.27)                     | 1.13 (0.64, 1.99)                  | 1.19 (0.67, 2.12)                  | 0.76 (0.40, 1.43)                  |
| PCB 172      | 0.95 (0.74, 1.21)                     | 0.84 (0.44, 1.60)                  | 1.60 (0.88, 2.91)                  | 0.81 (0.42, 1.56)                  |
| PCB 177      | 1.15 (0.80, 1.66)                     | 1.45 (0.82, 2.57)                  | 1.20 (0.65, 2.21)                  | 0.95 (0.52, 1.73)                  |
| PCB 178      | 0.97 (0.75, 1.25)                     | 1.14 (0.60, 2.18)                  | 1.13 (0.61, 2.09)                  | 0.94 (0.50, 1.77)                  |
| PCB 183      | 0.91 (0.64, 1.30)                     | 1.29 (0.72, 2.29)                  | 1.23 (0.69, 2.16)                  | 0.90 (0.48, 1.67)                  |
| PCB 187      | 0.88 (0.54, 1.42)                     | 0.99 (0.57, 1.75)                  | 0.92 (0.51, 1.67)                  | 0.92 (0.50, 1.70)                  |
| PCB 194      | 0.89 (0.54, 1.46)                     | 1.09 (0.62, 1.94)                  | 1.08 (0.61, 1.92)                  | 0.86 (0.47, 1.58)                  |
| PCB 195      | 0.91 (0.65, 1.26)                     | 1.23 (0.69, 2.21)                  | 1.05 (0.58, 1.91)                  | 0.82 (0.44, 1.50)                  |
| PCB 196      | 0.81 (0.47, 1.39)                     | 1.21 (0.69, 2.14)                  | 1.12 (0.64, 1.99)                  | 0.71 (0.37, 1.36)                  |
| PCB 201      | 0.93 (0.59, 1.49)                     | 1.07 (0.61, 1.90)                  | 0.99 (0.56, 1.75)                  | 0.85 (0.46, 1.60)                  |
| PCB 206      | 1.25 (0.75, 2.10)                     | 0.82 (0.46, 1.46)                  | 0.99 (0.56, 1.73)                  | 0.95 (0.53, 1.72)                  |
| PCB 209      | 1.06 (0.68, 1.63)                     | 0.95 (0.52, 1.74)                  | 1.20 (0.67, 2.14)                  | 1.04 (0.56, 1.94)                  |

Abbreviations: OR: Odds Ratio; LCL: Lower 95% Confidence Limit; UCL: Upper 95% Confidence Limit.

<sup>a</sup>Per unit increase in natural log-transformed ng/g lipid. <sup>b</sup>Adjusted for county, age at collection, date at collection.
